# Supplementary material
Source: publisher figshare collection journal article supplement (https://acs.figshare.com/ndownloader/files/12987956)
Supplement: Supplementary file 1 [file 12987956]

## Supporting Information

### **Preparation of Bone Marrow Mesenchymal Stem Cells Combined with Hydroxyapatite/Poly (d, l-lactide) Porous Microspheres for Bone Regeneration in Calvarial Defects**

Qiuxia Ding<sup>1</sup>, Ying Qu<sup>2</sup>, Kun Shi<sup>2</sup>, Xinye He<sup>2</sup>, Zhengqiong Chen<sup>1</sup>, Ying Yang<sup>1</sup>, Xiangwei Wang<sup>3</sup>, Zhiyong Qian<sup>2\*</sup>

<sup>1</sup> Department of Gynaecology and Obstetrics, Xinqiao Hospital, Third Military Medical University, Chongqing, China.

<sup>2</sup> State Key Laboratory of Biotherapy and Cancer Center, West China Hospital, West China Medical School, Sichuan University, Chengdu, P.R. China.

<sup>3</sup> Department of Urology, Center of Nephrology, General Hospital of Shenzhen University, Shenzhen, China.

---

\* To whom should be corresponded. E-mail: [anderson-qian@163.com](mailto:anderson-qian@163.com) (Qian ZY).

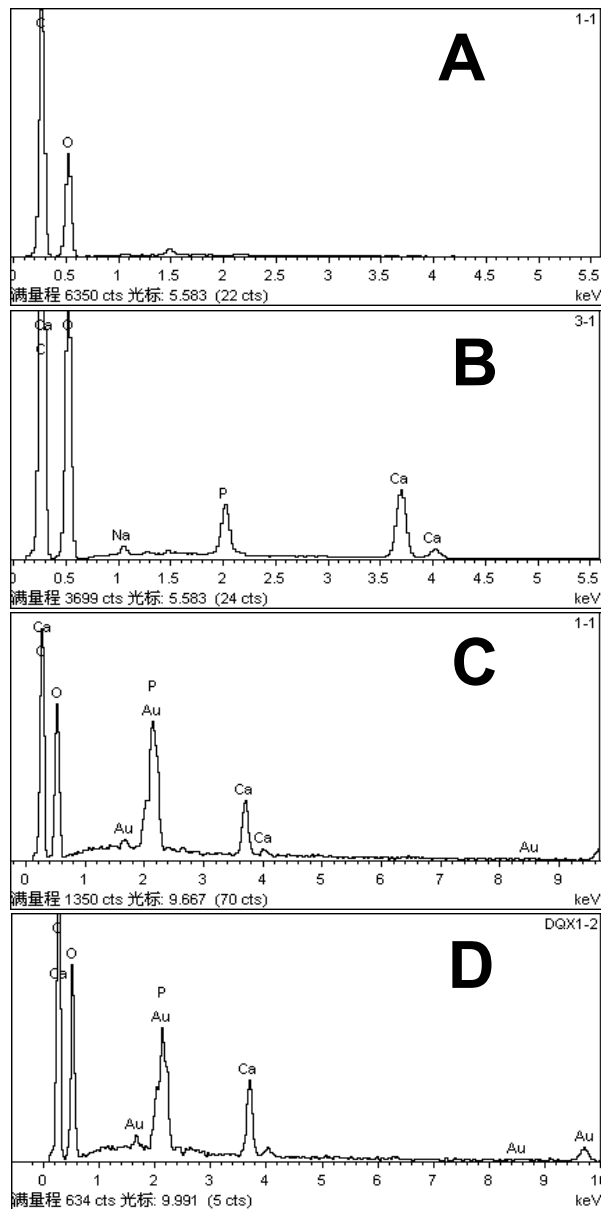

**S1:** The EDS of hydrolyzed PDLLA microspheres after incubation in 1.5SBF. (A) PDLLA microspheres, (B) nHAp/PDLLA mesoporous microspheres, (C) 4 days and (D) 8 days.
